# Supplementary material for: Do parenting styles and religious beliefs matter for child behavioral problem? The mediating role of digital literacy
Source: PubMed Central journal article supplement — Heliyon. 2022 Jun 25;8(6):e09788. doi: 10.1016/j.heliyon.2022.e09788 (PMC9253652; doi:10.1016/j.heliyon.2022.e09788), 2022-06-25

Date: June 17, 2022

Heliyon Editorial Office  
Cell Press  
50 Hampshire St., 5th Floor  
Cambridge, MA 02139, USA

Dear Editor:

We, the undersigned authors, write to request and agree to a change in the authorship of our article (manuscript number #HELIYON-D-22-01480R3#) entitled “Does Parenting Styles Matter For Child Behavior Problem? The Role of Digital Literacy”, as described below.

The original authorship was:

Sigit Purnama (Universitas Islam Negeri Sunan Kalijaga Yogyakarta, Indonesia)  
Agus Wibowo (Faculty of Economics, Universitas Negeri Jakarta, Indonesia)  
Bagus Shandy Narmaditya (Faculty of Economics, Universitas Negeri Malang, Indonesia)  
Qonitah Faizatul Fitriyah (Universitas Islam Negeri Sunan Kalijaga Yogyakarta, Indonesia)  
Hafidh Aziz (Universitas Islam Negeri Sunan Kalijaga Yogyakarta, Indonesia)

- We request the addition of the following author/s:
- We request the deletion of the following author/s:
- We request a change in author order as described below.

The new author list will be:

Sigit Purnama (Universitas Islam Negeri Sunan Kalijaga Yogyakarta, Indonesia)  
Agus Wibowo (Faculty of Economics, Universitas Negeri Jakarta, Indonesia)  
Bagus Shandy Narmaditya (Faculty of Economics, Universitas Negeri Malang, Indonesia)  
Qonitah Faizatul Fitriyah (**Faculty of Teacher Training and Education, Universitas Muhammadiyah Surakarta, Indonesia**)  
Hafidh Aziz (Universitas Islam Negeri Sunan Kalijaga Yogyakarta, Indonesia)

We made this change due to the change in the affiliation of Qonitah Faizatul Fitriyah, which was previously the Universitas Islam Negeri Sunan Kalijaga Yogyakarta, Indonesia to become the **Faculty of Teacher Training and Education, Universitas Muhammadiyah Surakarta, Indonesia** (new faculty member).

Sincerely,

Sigit Purnama

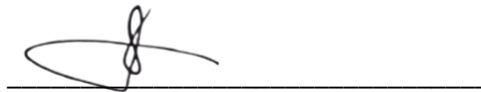

Agus Wibowo



Bagus Shandy Narmaditya

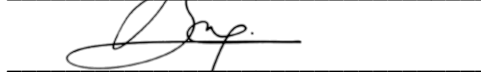

Qonitah Faizatul Fitriyah



Hafidh Aziz



Supplement: mmc1.pdf [file mmc1.pdf]
